# Supplementary material for: Frequency domain water table fluctuations reveal recharge in fractured aquifers depends on both intense and seasonal rainfall and unsaturated zone thickness
Source: Copernicus journal article supplement (doi:10.5194/hess-2022-201), 2022-06-14
Supplement: Supplementary file [file hess-2022-201-AC1-supplement.pdf]

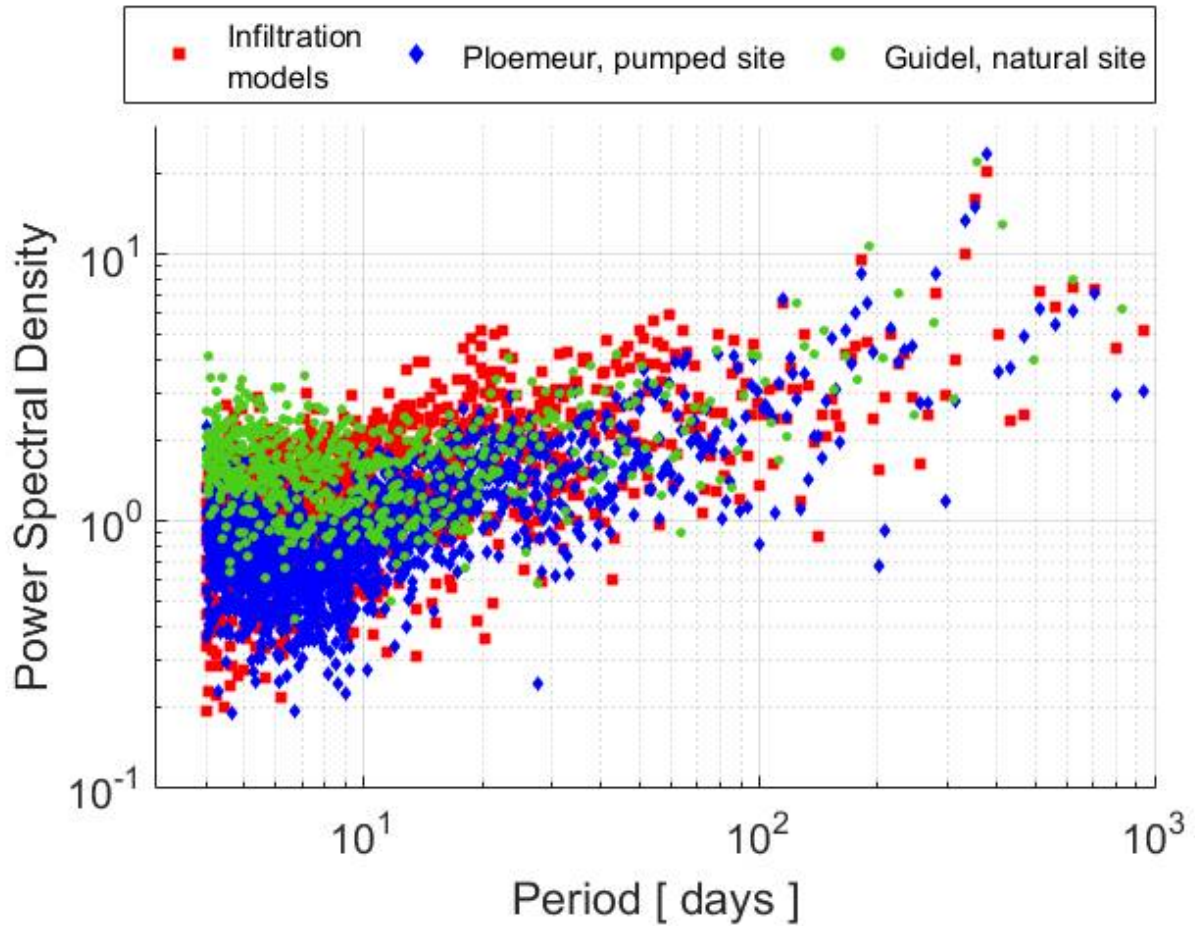

Figure 1: Power spectrum of recharge estimated from infiltration models and from groundwater levels fluctuations in Ploemeur and Guidel sites.
